# Supplementary material
Source: publisher site journal article supplement (https://www.dovepress.com/get_supplementary_file.php?f=508577.xlsx)
Supplement: Supplementary file 1 [file get_supplementary_file.php]

## Sheet: DEPs
Accession	control_1	control_2	control_3	ablation_1	ablation_2	ablation_3	Description	ProteinGroup	P.Value	Fold.Change	Protein names	Gene Names
A0A0A6YVW3	1	1.19	1.1	0.56	0.08	0.48	Immunoglobulin heavy variable V1-23 (Fragment) OS=Mus musculus OX=10090 GN=Ighv1-23 PE=4 SV=1	A0A0A6YVW3	0.0280208	-2.9375	Immunoglobulin heavy variable V1-23	Ighv1-23
Q8R086	1	1.02	1.01	0.7	0.52	0.77	Sulfite oxidase mitochondrial OS=Mus musculus OX=10090 GN=Suox PE=1 SV=2	Q8R086	0.042433	-1.52261	Sulfite oxidase, mitochondrial, EC 1.8.3.1	Suox
P01680	1	1.2	1.03	0.91	0.72	0.84	Ig kappa chain V-IV region S107B OS=Mus musculus OX=10090 PE=4 SV=1	P01680	0.0391586	-1.30769	Ig kappa chain V-IV region S107B
Q8R507	1	1.05	0.93	0.72	0.75	0.9	Ribitol-5-phosphate transferase FKTN OS=Mus musculus OX=10090 GN=Fktn PE=1 SV=1	Q8R507	0.0460009	-1.25738	Ribitol-5-phosphate transferase FKTN, EC 2.7.8.- (Fukutin) (Fukuyama-type congenital muscular dystrophy protein) (Ribitol-5-phosphate transferase)	Fktn Fcmd
P28076	1	0.99	0.86	0.74	0.77	0.85	Proteasome subunit beta type-9 OS=Mus musculus OX=10090 GN=Psmb9 PE=1 SV=1	P28076	0.047909	-1.20763	Proteasome subunit beta type-9, EC 3.4.25.1 (LMP-2d) (Low molecular mass protein 2) (Macropain chain 7) (Multicatalytic endopeptidase complex chain 7) (Proteasome chain 7) (Proteasome subunit beta-1i) (Really interesting new gene 12 protein)	Psmb9 Lmp2 Ring12
Q3TFD2	1	0.96	1.03	1.19	1.24	1.16	Lysophosphatidylcholine acyltransferase 1 OS=Mus musculus OX=10090 GN=Lpcat1 PE=1 SV=1	Q3TFD2	0.00314173	1.20067	Lysophosphatidylcholine acyltransferase 1, LPC acyltransferase 1, LPCAT-1, LysoPC acyltransferase 1, mLPCAT1, EC 2.3.1.23 (1-acylglycerol-3-phosphate O-acyltransferase, EC 2.3.1.51) (1-acylglycerophosphocholine O-acyltransferase) (1-alkenylglycerophosphocholine O-acyltransferase, EC 2.3.1.25) (1-alkylglycerophosphocholine O-acetyltransferase, EC 2.3.1.67) (Acetyl-CoA:lyso-platelet-activating fact…	Lpcat1 Aytl2
Q8VC31	1	0.86	1.01	1.22	1.17	1.06	Coiled-coil domain-containing protein 9 OS=Mus musculus OX=10090 GN=Ccdc9 PE=1 SV=1	Q8VC31	0.0460796	1.20209	Coiled-coil domain-containing protein 9	Ccdc9
Q3TUH1	1	0.98	1.03	1.21	1.15	1.26	Phosphatidate cytidylyltransferase mitochondrial OS=Mus musculus OX=10090 GN=Tamm41 PE=1 SV=2	Q3TUH1	0.0122144	1.20266	Phosphatidate cytidylyltransferase, mitochondrial, EC 2.7.7.41 (CDP-diacylglycerol synthase, CDP-DAG synthase) (Mitochondrial translocator assembly and maintenance protein 41 homolog, TAM41)	Tamm41
Q91Z31	1	0.87	1.03	1.2	1.18	1.11	Polypyrimidine tract-binding protein 2 OS=Mus musculus OX=10090 GN=Ptbp2 PE=1 SV=2	Q91Z31	0.0369434	1.20345	Polypyrimidine tract-binding protein 2 (Brain-enriched polypyrimidine tract-binding protein, Brain-enriched PTB) (Neural polypyrimidine tract-binding protein) (RRM-type RNA-binding protein brPTB)	Ptbp2 Brptb Nptb
Q91V81	1	0.89	1.03	1.2	1.18	1.14	RNA-binding protein 42 OS=Mus musculus OX=10090 GN=Rbm42 PE=1 SV=2	Q91V81	0.0285739	1.20548	RNA-binding protein 42 (RNA-binding motif protein 42)	Rbm42
Q8QZY6	1	1.02	0.98	1.18	1.18	1.26	Tetraspanin-14 OS=Mus musculus OX=10090 GN=Tspan14 PE=1 SV=1	Q8QZY6	0.00780629	1.20667	Tetraspanin-14, Tspan-14 (Transmembrane 4 superfamily member 14)	Tspan14 D14Ertd226e Tm4sf14
Q9D720	1	0.9	1.05	1.14	1.21	1.21	Non-structural maintenance of chromosomes element 1 homolog OS=Mus musculus OX=10090 GN=Nsmce1 PE=1 SV=1	Q9D720	0.0260224	1.20678	Non-structural maintenance of chromosomes element 1 homolog, Non-SMC element 1 homolog, EC 2.3.2.27	Nsmce1
Q4ZGD9	1	1.14	1.18	1.44	1.25	1.32	Nuclear RNA export factor 3 OS=Mus musculus OX=10090 GN=Nxf3 PE=1 SV=1	Q4ZGD9	0.0417491	1.20783	Nuclear RNA export factor 3 (Nuclear export factor 3)	Nxf3 NXF3
Q78HU3	1	1.04	1.2	1.29	1.36	1.27	Multivesicular body subunit 12A OS=Mus musculus OX=10090 GN=Mvb12a PE=1 SV=1	Q78HU3	0.0483686	1.20988	Multivesicular body subunit 12A (ESCRT-I complex subunit MVB12A) (Protein FAM125A)	Mvb12a Fam125a
Q9CZP3	1	1.07	1.18	1.31	1.3	1.33	Zinc finger protein 655 OS=Mus musculus OX=10090 GN=Zfp655 PE=1 SV=1	Q9CZP3	0.0447516	1.21231	Zinc finger protein 655	Zfp655
P11032	1	0.98	1.08	1.28	1.31	1.12	Granzyme A OS=Mus musculus OX=10090 GN=Gzma PE=1 SV=2	P11032	0.0470207	1.21242	Granzyme A, EC 3.4.21.78 (Autocrine thymic lymphoma granzyme-like serine protease) (CTLA-3) (Fragmentin-1) (T cell-specific serine protease 1, TSP-1)	Gzma Ctla-3 Ctla3 Mtsp-1
Q8VD72	1	1.13	1.15	1.27	1.36	1.35	Tetratricopeptide repeat protein 8 OS=Mus musculus OX=10090 GN=Ttc8 PE=1 SV=1	Q8VD72	0.0198421	1.21341	Tetratricopeptide repeat protein 8, TPR repeat protein 8 (Bardet-Biedl syndrome 8 protein homolog)	Ttc8 Bbs8
Q3TLR7	1	1.18	1.19	1.26	1.44	1.4	Denticleless protein homolog OS=Mus musculus OX=10090 GN=Dtl PE=1 SV=2	Q3TLR7	0.0426191	1.21662	Denticleless protein homolog (Lethal(2) denticleless protein homolog) (Meth A retinoic acid-regulated nuclear matrix-associated protein, Meth A RAMP) (Retinoic acid-regulated nuclear matrix-associated protein)	Dtl Cdt2 L2dtl Ramp
P70698	1	1.09	1.18	1.24	1.31	1.43	CTP synthase 1 OS=Mus musculus OX=10090 GN=Ctps1 PE=1 SV=2	P70698	0.0359561	1.21713	CTP synthase 1, EC 6.3.4.2 (CTP synthetase 1) (UTP--ammonia ligase 1)	Ctps1 Ctps
Q99KI3	1	0.98	1.15	1.16	1.3	1.35	ER membrane protein complex subunit 3 OS=Mus musculus OX=10090 GN=Emc3 PE=1 SV=3	Q99KI3	0.0443191	1.21725	ER membrane protein complex subunit 3 (Transmembrane protein 111)	Emc3 Tmem111
Q9JJK2	1	0.93	1.01	1.17	1.16	1.25	LanC-like protein 2 OS=Mus musculus OX=10090 GN=Lancl2 PE=1 SV=1	Q9JJK2	0.00517618	1.21769	LanC-like protein 2 (Testis-specific adriamycin sensitivity protein)	Lancl2 Tasp
Q05512	1	1.01	1.18	1.26	1.23	1.41	Serine/threonine-protein kinase MARK2 OS=Mus musculus OX=10090 GN=Mark2 PE=1 SV=3	Q05512	0.0428065	1.22257	Serine/threonine-protein kinase MARK2, EC 2.7.11.1, EC 2.7.11.26 (ELKL motif kinase 1, EMK-1) (MAP/microtubule affinity-regulating kinase 2) (PAR1 homolog) (PAR1 homolog b, Par-1b, mPar-1b)	Mark2 Emk
Q9CQL7	1	1	1.17	1.38	1.25	1.25	MORF4 family-associated protein 1 OS=Mus musculus OX=10090 GN=Mrfap1 PE=1 SV=1	Q9CQL7	0.0325213	1.22397	MORF4 family-associated protein 1 (Protein associated with MRG of 14 kDa)	Mrfap1 Pam14 MNCb-1039
Q9DBU6	1	0.96	0.94	1.18	1.15	1.22	Serine/Arginine-related protein 53 OS=Mus musculus OX=10090 GN=Rsrc1 PE=1 SV=1	Q9DBU6	0.00139229	1.22414	Serine/Arginine-related protein 53, SRrp53 (Arginine/serine-rich coiled-coil protein 1)	Rsrc1 Srrp53
Q8VHI3	1	0.89	0.83	1.08	1.15	1.1	GDP-fucose protein O-fucosyltransferase 2 OS=Mus musculus OX=10090 GN=Pofut2 PE=1 SV=1	Q8VHI3	0.0396747	1.22426	GDP-fucose protein O-fucosyltransferase 2, EC 2.4.1.221 (Peptide-O-fucosyltransferase 2, O-FucT-2)	Pofut2
Q14CH7	1	0.96	1.11	1.19	1.33	1.24	Alanine--tRNA ligase mitochondrial OS=Mus musculus OX=10090 GN=Aars2 PE=1 SV=1	Q14CH7	0.0196097	1.22476	Alanine--tRNA ligase, mitochondrial, EC 6.1.1.7 (Alanyl-tRNA synthetase, AlaRS)	Aars2 Aarsl Gm89 Kiaa1270
Q8BGZ4	1	1	1.07	1.23	1.29	1.24	Cell division cycle protein 23 homolog OS=Mus musculus OX=10090 GN=Cdc23 PE=1 SV=2	Q8BGZ4	0.00185353	1.22476	Cell division cycle protein 23 homolog (Anaphase-promoting complex subunit 8, APC8) (Cyclosome subunit 8)	Cdc23 Anapc8
E9Q9Q2	1	0.84	1.01	1.13	1.19	1.18	R3H domain-containing 1 OS=Mus musculus OX=10090 GN=R3hdm1 PE=1 SV=1	E9Q9Q2	0.0471862	1.22807	R3H domain-containing 1	R3hdm1
Q8BGQ1	1	0.85	0.95	1.19	1.07	1.18	Spermatogenesis-defective protein 39 homolog OS=Mus musculus OX=10090 GN=Vipas39 PE=1 SV=1	Q8BGQ1	0.0225401	1.22857	Spermatogenesis-defective protein 39 homolog, hSPE-39 (VPS33B-interacting protein in apical-basolateral polarity regulator) (VPS33B-interacting protein in polarity and apical restriction)	Vipas39 Spe39 Vipar
Q8BGG7	1	0.93	0.95	1.08	1.22	1.24	Ubiquitin-associated and SH3 domain-containing protein B OS=Mus musculus OX=10090 GN=Ubash3b PE=1 SV=1	Q8BGG7	0.0340108	1.22917	Ubiquitin-associated and SH3 domain-containing protein B, EC 3.1.3.48 (Cbl-interacting protein p70) (Suppressor of T-cell receptor signaling 1, STS-1) (T-cell ubiquitin ligand 2, TULA-2) (Tyrosine-protein phosphatase STS1/TULA2)	Ubash3b Sts1
P82343	1	0.91	1	1.09	1.2	1.29	N-acylglucosamine 2-epimerase OS=Mus musculus OX=10090 GN=Renbp PE=1 SV=3	P82343	0.0415193	1.23024	N-acylglucosamine 2-epimerase, AGE, EC 5.1.3.8 (GlcNAc 2-epimerase) (N-acetyl-D-glucosamine 2-epimerase) (Renin-binding protein, RnBP)	Renbp
P51949	1	0.9	0.99	1.23	1.22	1.11	CDK-activating kinase assembly factor MAT1 OS=Mus musculus OX=10090 GN=Mnat1 PE=1 SV=2	P51949	0.01192	1.23183	CDK-activating kinase assembly factor MAT1 (CDK7/cyclin-H assembly factor) (Menage a trois) (RING finger protein MAT1) (p35) (p36)	Mnat1 Mat1
Q9QUG9	1	0.84	0.87	1.03	1.1	1.21	RAS guanyl-releasing protein 2 OS=Mus musculus OX=10090 GN=Rasgrp2 PE=1 SV=2	Q9QUG9	0.0432612	1.23247	RAS guanyl-releasing protein 2 (Calcium and DAG-regulated guanine nucleotide exchange factor I, CalDAG-GEFI) (F25B3.3 kinase-like protein)	Rasgrp2
Q3TYA6	1	0.89	1.07	1.23	1.2	1.22	M-phase phosphoprotein 8 OS=Mus musculus OX=10090 GN=Mphosph8 PE=1 SV=1	Q3TYA6	0.0447516	1.23311	M-phase phosphoprotein 8	Mphosph8 Mpp8
Q9JIB0	1	1.16	1.24	1.52	1.36	1.32	Ran guanine nucleotide release factor OS=Mus musculus OX=10090 GN=Rangrf PE=1 SV=1	Q9JIB0	0.047171	1.23529	Ran guanine nucleotide release factor, RanGNRF (Ran-binding protein MOG1)	Rangrf Mog1 Rangnrf
P62069	1	0.98	1.07	1.3	1.18	1.29	Ubiquitin carboxyl-terminal hydrolase 46 OS=Mus musculus OX=10090 GN=Usp46 PE=1 SV=1	P62069;Q9D9M2	0.00922109	1.23607	Ubiquitin carboxyl-terminal hydrolase 46, EC 3.4.19.12 (Deubiquitinating enzyme 46) (Ubiquitin thioesterase 46) (Ubiquitin-specific-processing protease 46)	Usp46
Q8R3L2	1	1	1.17	1.26	1.32	1.34	Transcription factor 25 OS=Mus musculus OX=10090 GN=Tcf25 PE=1 SV=2	Q8R3L2	0.0328313	1.23659	Transcription factor 25, TCF-25 (Nuclear localized protein 1)	Tcf25 D8Ertd325e Nulp1
Q8R3B7	1	1.05	1.2	1.35	1.38	1.29	Bromodomain-containing protein 8 OS=Mus musculus OX=10090 GN=Brd8 PE=1 SV=2	Q8R3B7	0.0348154	1.23692	Bromodomain-containing protein 8	Brd8
Q9CXY9	1	0.92	0.95	1.16	1.2	1.19	GPI-anchor transamidase OS=Mus musculus OX=10090 GN=Pigk PE=1 SV=2	Q9CXY9	0.00330156	1.23693	GPI-anchor transamidase, GPI transamidase, EC 3.-.-.- (Phosphatidylinositol-glycan biosynthesis class K protein, PIG-K)	Pigk
Q922G2	1	0.82	0.91	1.19	1.14	1.05	Protein FAM76A OS=Mus musculus OX=10090 GN=Fam76a PE=2 SV=1	Q922G2	0.033139	1.2381	Protein FAM76A	Fam76a
Q9ESE1	1	1.03	1	1.21	1.26	1.29	Lipopolysaccharide-responsive and beige-like anchor protein OS=Mus musculus OX=10090 GN=Lrba PE=1 SV=1	Q9ESE1	0.0036205	1.24092	Lipopolysaccharide-responsive and beige-like anchor protein (Beige-like protein)	Lrba Bgl Lba
P07607	1	1.05	1.17	1.33	1.4	1.27	Thymidylate synthase OS=Mus musculus OX=10090 GN=Tyms PE=1 SV=1	P07607	0.0169761	1.24224	Thymidylate synthase, TS, TSase, EC 2.1.1.45	Tyms
Q7TMC8	1	0.9	1.03	1.16	1.23	1.25	L-fucose kinase OS=Mus musculus OX=10090 GN=Fcsk PE=1 SV=1	Q7TMC8	0.0104254	1.24232	L-fucose kinase, Fucokinase, EC 2.7.1.52	Fcsk Fuk
Q3URU2	1	1	1.16	1.33	1.18	1.42	Paternally-expressed gene 3 protein OS=Mus musculus OX=10090 GN=Peg3 PE=1 SV=1	Q3URU2	0.0471494	1.24367	Paternally-expressed gene 3 protein (ASF-1)	Peg3 Kiaa0287 Pw1
Q9JM05	1	1.12	0.94	1.36	1.23	1.22	E3 SUMO-protein ligase PIAS4 OS=Mus musculus OX=10090 GN=Pias4 PE=1 SV=2	Q9JM05	0.0238202	1.2451	E3 SUMO-protein ligase PIAS4, EC 2.3.2.27 (PIASy) (Protein inhibitor of activated STAT protein 4) (Protein inhibitor of activated STAT protein gamma, PIAS-gamma)	Pias4 Piasg
Q8C0C0	1	0.96	1.13	1.32	1.23	1.31	Zinc fingers and homeoboxes protein 2 OS=Mus musculus OX=10090 GN=Zhx2 PE=1 SV=1	Q8C0C0	0.0203183	1.24919	Zinc fingers and homeoboxes protein 2 (Alpha-fetoprotein regulator 1, AFP regulator 1) (Regulator of AFP) (Zinc finger and homeodomain protein 2)	Zhx2 Afr1 Raf
P10404	1	0.99	1.07	1.34	1.21	1.28	MLV-related proviral Env polyprotein OS=Mus musculus OX=10090 PE=1 SV=3	P10404	0.00707734	1.25163	MLV-related proviral Env polyprotein [Cleaved into: Surface protein, SU;Transmembrane protein, TM ]
Q9D8P4	1	1.08	1.13	1.37	1.4	1.25	39S ribosomal protein L17 mitochondrial OS=Mus musculus OX=10090 GN=Mrpl17 PE=1 SV=1	Q9D8P4	0.0113643	1.25234	39S ribosomal protein L17, mitochondrial, L17mt, MRP-L17	Mrpl17
Q60680	1	0.93	1.06	1.11	1.33	1.31	Inhibitor of nuclear factor kappa-B kinase subunit alpha OS=Mus musculus OX=10090 GN=Chuk PE=1 SV=1	Q60680	0.0487751	1.25418	Inhibitor of nuclear factor kappa-B kinase subunit alpha, I-kappa-B kinase alpha, IKK-A, IKK-alpha, IkBKA, IkappaB kinase, EC 2.7.11.10 (Conserved helix-loop-helix ubiquitous kinase) (I-kappa-B kinase 1, IKK1) (Nuclear factor NF-kappa-B inhibitor kinase alpha, NFKBIKA)	Chuk Ikka
Q9QYY8	1	0.94	1.13	1.36	1.16	1.34	Spastin OS=Mus musculus OX=10090 GN=Spast PE=1 SV=3	Q9QYY8	0.0367824	1.25733	Spastin, EC 5.6.1.1	Spast Kiaa1083 Spg4
O70174	1	0.93	1.03	1.21	1.26	1.27	Neuronal acetylcholine receptor subunit alpha-4 OS=Mus musculus OX=10090 GN=Chrna4 PE=1 SV=2	O70174	0.00337371	1.26351	Neuronal acetylcholine receptor subunit alpha-4	Chrna4 Acra4
Q61321	1	1.09	1.21	1.31	1.41	1.45	Homeobox protein SIX4 OS=Mus musculus OX=10090 GN=Six4 PE=1 SV=1	Q61321	0.0215501	1.26364	Homeobox protein SIX4 (Sine oculis homeobox homolog 4) (Skeletal muscle-specific ARE-binding protein AREC3)	Six4 Arec3
Q9CQN7	1	0.94	1.11	1.23	1.29	1.37	39S ribosomal protein L41 mitochondrial OS=Mus musculus OX=10090 GN=Mrpl41 PE=1 SV=1	Q9CQN7	0.0131626	1.27541	39S ribosomal protein L41, mitochondrial, L41mt, MRP-L41	Mrpl41
P58021	1	1.01	1.06	1.28	1.4	1.24	Transmembrane 9 superfamily member 2 OS=Mus musculus OX=10090 GN=Tm9sf2 PE=1 SV=1	P58021	0.0173338	1.27687	Transmembrane 9 superfamily member 2	Tm9sf2
P60487	1	0.99	1.1	1.34	1.38	1.23	Chronophin OS=Mus musculus OX=10090 GN=Pdxp PE=1 SV=1	P60487	0.00847065	1.27832	Chronophin, EC 3.1.3.16, EC 3.1.3.74 (Pyridoxal 5'-phosphate phosphatase) (Pyridoxal phosphate phosphatase, PLP phosphatase)	Pdxp Cin Plp Plpp
P97433	1	0.99	1.1	1.23	1.33	1.43	Rho guanine nucleotide exchange factor 28 OS=Mus musculus OX=10090 GN=Arhgef28 PE=1 SV=1	P97433	0.0173281	1.29126	Rho guanine nucleotide exchange factor 28 (190 kDa guanine nucleotide exchange factor, p190-RhoGEF, p190RhoGEF) (Rho guanine nucleotide exchange factor) (Rho-interacting protein 2)	Arhgef28 Kiaa1998 Rgnef Rhoip2 Rip2
Q60952	1	0.78	0.82	1.23	1.05	1.1	Centrosome-associated protein CEP250 OS=Mus musculus OX=10090 GN=Cep250 PE=1 SV=4	Q60952	0.0421645	1.3	Centrosome-associated protein CEP250 (250 kDa centrosomal protein, Cep250) (Centrosomal Nek2-associated protein 1, C-Nap1) (Centrosomal protein 2) (Intranuclear matrix protein)	Cep250 Cep2 Inmp
Q8C2K1	1	1.06	1.23	1.36	1.55	1.37	Differentially expressed in FDCP 6 OS=Mus musculus OX=10090 GN=Def6 PE=1 SV=1	Q8C2K1	0.0238918	1.30091	Differentially expressed in FDCP 6, DEF-6 (IRF4-binding protein) (SWAP-70-like adapter of T-cells)	Def6 Ibp Slat
Q8K4I3	1	0.94	1.05	1.19	1.34	1.37	Rho guanine nucleotide exchange factor 6 OS=Mus musculus OX=10090 GN=Arhgef6 PE=1 SV=1	Q8K4I3	0.015689	1.30435	Rho guanine nucleotide exchange factor 6 (Alpha-PIX) (Rac/Cdc42 guanine nucleotide exchange factor 6)	Arhgef6
Q80X85	1	1.01	1.17	1.27	1.5	1.38	28S ribosomal protein S7 mitochondrial OS=Mus musculus OX=10090 GN=Mrps7 PE=1 SV=1	Q80X85	0.0212367	1.30503	28S ribosomal protein S7, mitochondrial, MRP-S7, S7mt	Mrps7
Q9D4V0	1	0.92	1.19	1.39	1.4	1.31	Ethanolamine kinase 1 OS=Mus musculus OX=10090 GN=Etnk1 PE=1 SV=2	Q9D4V0	0.0417323	1.31833	Ethanolamine kinase 1, EKI 1, EC 2.7.1.82	Etnk1 Eki1
Q924L1	1	0.77	0.94	1.21	1.17	1.2	LETM1 domain-containing protein 1 OS=Mus musculus OX=10090 GN=Letmd1 PE=1 SV=1	Q924L1	0.0483081	1.32103	LETM1 domain-containing protein 1 (Cervical cancer receptor) (MCC-32)	Letmd1 Mccr
Q9CQS9	1	0.82	0.95	1.2	1.23	1.23	HAUS augmin-like complex subunit 2 OS=Mus musculus OX=10090 GN=Haus2 PE=2 SV=1	Q9CQS9	0.0277528	1.3213	HAUS augmin-like complex subunit 2 (Centrosomal protein of 27 kDa, Cep27)	Haus2 Cep27
Q8C1Q6	1	0.97	1.11	1.22	1.43	1.46	Small integral membrane protein 4 OS=Mus musculus OX=10090 GN=Smim4 PE=1 SV=2	Q8C1Q6	0.0261789	1.33442	Small integral membrane protein 4 (Small nucleolar RNA host gene 8)	Smim4
G5E8P1	1	0.85	0.98	1.2	1.23	1.35	Bromodomain-containing protein 1 OS=Mus musculus OX=10090 GN=Brd1 PE=1 SV=1	G5E8P1	0.00851926	1.33569	Bromodomain-containing protein 1 (Bromodomain and PHD finger-containing protein 2)	Brd1 Brpf2 Kiaa4191
Q99N84	1	0.91	1.06	1.36	1.28	1.36	28S ribosomal protein S18b mitochondrial OS=Mus musculus OX=10090 GN=Mrps18b PE=1 SV=1	Q99N84	0.00488551	1.3468	28S ribosomal protein S18b, mitochondrial, MRP-S18-b, Mrps18-b, S18mt-b (28S ribosomal protein S18-2, mitochondrial, MRP-S18-2)	Mrps18b
Q6P1G2	1	0.94	0.93	1.25	1.43	1.19	Lysine-specific demethylase 2B OS=Mus musculus OX=10090 GN=Kdm2b PE=1 SV=1	Q6P1G2	0.0346646	1.34843	Lysine-specific demethylase 2B, EC 1.14.11.27 (F-box and leucine-rich repeat protein 10) (F-box protein FBL10) (F-box/LRR-repeat protein 10) (JmjC domain-containing histone demethylation protein 1B) ([Histone-H3]-lysine-36 demethylase 1B)	Kdm2b Fbl10 Fbxl10 Jhdm1b Kiaa3014
Q3UMM4	1	1.11	1.39	1.71	1.68	1.4	Cyclin-dependent kinase 10 OS=Mus musculus OX=10090 GN=Cdk10 PE=1 SV=1	Q3UMM4	0.0491694	1.36857	Cyclin-dependent kinase 10, EC 2.7.11.22 (Cell division protein kinase 10)	Cdk10
Q9DBS5	1	0.84	0.93	1.13	1.26	1.45	Kinesin light chain 4 OS=Mus musculus OX=10090 GN=Klc4 PE=1 SV=1	Q9DBS5	0.0427629	1.38628	Kinesin light chain 4, KLC 4 (Kinesin-like protein 8)	Klc4 Knsl8
Q4VGL6	1	0.76	0.83	1.13	1.38	1.09	Roquin-1 OS=Mus musculus OX=10090 GN=Rc3h1 PE=1 SV=1	Q4VGL6	0.0463184	1.38996	Roquin-1, Roquin, EC 2.3.2.27 (Protein Sanroque) (RING finger and C3H zinc finger protein 1) (RING finger and CCCH-type zinc finger domain-containing protein 1)	Rc3h1 Gm551 Kiaa2025
Q69Z99	1	0.86	0.98	1.13	1.35	1.47	Zinc finger protein 512 OS=Mus musculus OX=10090 GN=Znf512 PE=2 SV=2	Q69Z99	0.0484647	1.39085	Zinc finger protein 512	Znf512 Kiaa1805 Zfp512
Q9WV85	1	0.85	0.97	1.24	1.39	1.3	Nucleoside diphosphate kinase 3 OS=Mus musculus OX=10090 GN=Nme3 PE=1 SV=3	Q9WV85	0.00429191	1.39362	Nucleoside diphosphate kinase 3, NDK 3, NDP kinase 3, EC 2.7.4.6 (DR-nm23) (Nucleoside diphosphate kinase C, NDPKC) (nm23-M3)	Nme3
P82347	1	0.87	0.83	1.34	1.1	1.33	Delta-sarcoglycan OS=Mus musculus OX=10090 GN=Sgcd PE=1 SV=1	P82347	0.0248777	1.3963	Delta-sarcoglycan, Delta-SG (35 kDa dystrophin-associated glycoprotein, 35DAG)	Sgcd
Q5SVQ0	1	1.25	1.33	1.57	1.84	1.59	Histone acetyltransferase KAT7 OS=Mus musculus OX=10090 GN=Kat7 PE=1 SV=1	Q5SVQ0	0.0237438	1.39665	Histone acetyltransferase KAT7, EC 2.3.1.48 (Histone acetyltransferase binding to ORC1) (Lysine acetyltransferase 7) (MOZ, YBF2/SAS3, SAS2 and TIP60 protein 2, MYST-2)	Kat7 Hbo1 Myst2
Q91Y74	1	0.92	1.04	1.24	1.56	1.34	CMP-N-acetylneuraminate-beta-galactosamide-alpha-2 3-sialyltransferase 4 OS=Mus musculus OX=10090 GN=St3gal4 PE=1 SV=1	Q91Y74	0.040008	1.39865	CMP-N-acetylneuraminate-beta-galactosamide-alpha-2,3-sialyltransferase 4, Alpha 2,3-ST 4, Beta-galactoside alpha-2,3-sialyltransferase 4, EC 2.4.99.2, EC 2.4.99.4 (Alpha 2,3-sialyltransferase IV) (Gal-beta-1,3-GalNAc-alpha-2,3-sialyltransferase) (Gal-beta-1,4-GlcNAc-alpha-2,3-sialyltransferase) (N-acetyllactosaminide alpha-2,3-sialyltransferase, EC 2.4.99.6) (ST3Gal IV, ST3GalIV) (Sialyltransfera…	St3gal4 Siat4c
B1AR17	1	1.02	1.33	1.74	1.35	1.6	DNA helicase OS=Mus musculus OX=10090 GN=Chd3 PE=1 SV=1	B1AR17	0.0462462	1.4	DNA helicase, EC 3.6.4.12	Chd3
Q9QZ05	1	0.93	1.09	1.24	1.53	1.46	eIF-2-alpha kinase GCN2 OS=Mus musculus OX=10090 GN=Eif2ak4 PE=1 SV=2	Q9QZ05	0.0259205	1.40066	eIF-2-alpha kinase GCN2 (Eukaryotic translation initiation factor 2-alpha kinase 4, EC 2.7.11.1) (GCN2-like protein, mGCN2)	Eif2ak4 Gcn2 Kiaa1338
P61620	1	0.9	0.94	1.4	1.42	1.24	Protein transport protein Sec61 subunit alpha isoform 1 OS=Mus musculus OX=10090 GN=Sec61a1 PE=1 SV=2	P61620	0.00806635	1.42958	Protein transport protein Sec61 subunit alpha isoform 1, Sec61 alpha-1	Sec61a1 Sec61a
Q9JKK8	1	0.82	1.12	1.35	1.56	1.3	Serine/threonine-protein kinase ATR OS=Mus musculus OX=10090 GN=Atr PE=1 SV=2	Q9JKK8	0.0233817	1.43197	Serine/threonine-protein kinase ATR, EC 2.7.11.1 (Ataxia telangiectasia and Rad3-related protein)	Atr Kiaa4069
Q9CR88	1	0.96	1.1	1.53	1.46	1.42	28S ribosomal protein S14 mitochondrial OS=Mus musculus OX=10090 GN=Mrps14 PE=1 SV=1	Q9CR88	0.00134408	1.44118	28S ribosomal protein S14, mitochondrial, MRP-S14, S14mt	Mrps14
Q8BVI5	1	0.73	1.07	1.31	1.35	1.41	Syntaxin-16 OS=Mus musculus OX=10090 GN=Stx16 PE=1 SV=3	Q8BVI5	0.0463435	1.45357	Syntaxin-16	Stx16
Q9D8T7	1	1.18	1.31	1.47	1.7	1.96	SRA stem-loop-interacting RNA-binding protein mitochondrial OS=Mus musculus OX=10090 GN=Slirp PE=1 SV=2	Q9D8T7	0.0395624	1.46991	SRA stem-loop-interacting RNA-binding protein, mitochondrial	Slirp
Q99LM9	1	0.9	1.1	1.62	1.49	1.35	Transcriptional adapter 1 OS=Mus musculus OX=10090 GN=Tada1 PE=2 SV=1	Q99LM9	0.0091494	1.48667	Transcriptional adapter 1 (Transcriptional adapter 1-like protein)	Tada1 Tada1l
Q8R317	1	0.7	0.9	1.22	1.32	1.33	Ubiquilin-1 OS=Mus musculus OX=10090 GN=Ubqln1 PE=1 SV=1	Q8R317	0.0278027	1.48846	Ubiquilin-1 (Protein linking IAP with cytoskeleton 1, PLIC-1)	Ubqln1 Plic1
O55187	1	1.01	1.12	1.46	1.61	1.76	E3 SUMO-protein ligase CBX4 OS=Mus musculus OX=10090 GN=Cbx4 PE=1 SV=2	O55187	0.0118261	1.54313	E3 SUMO-protein ligase CBX4, EC 2.3.2.- (Chromobox protein homolog 4) (E3 SUMO-protein transferase CBX4) (Polycomb 2 homolog, Pc2, mPc2)	Cbx4 Pc2
Q5SV77	1	1.12	1.02	1.41	1.79	1.69	Gametogenetin-binding protein 2 OS=Mus musculus OX=10090 GN=Ggnbp2 PE=1 SV=1	Q5SV77	0.0266355	1.55732	Gametogenetin-binding protein 2 (Dioxin-inducible factor 3, DIF-3) (Protein ZNF403)	Ggnbp2 Zfp403 Znf403
Q99K30	1	0.72	0.74	1.3	1.42	1.16	Epidermal growth factor receptor kinase substrate 8-like protein 2 OS=Mus musculus OX=10090 GN=Eps8l2 PE=1 SV=1	Q99K30	0.0167348	1.57724	Epidermal growth factor receptor kinase substrate 8-like protein 2, EPS8-like protein 2 (Epidermal growth factor receptor pathway substrate 8-related protein 2, EPS8-related protein 2)	Eps8l2 Eps8r2
Q9D7M8	1	0.93	0.78	1.41	1.52	1.47	DNA-directed RNA polymerase II subunit RPB4 OS=Mus musculus OX=10090 GN=Polr2d PE=1 SV=2	Q9D7M8	0.00490333	1.62362	DNA-directed RNA polymerase II subunit RPB4, RNA polymerase II subunit B4 (DNA-directed RNA polymerase II subunit D)	Polr2d
Q6IMF0	1	0.7	0.71	1.07	1.46	1.4	Keratin type II cuticular 87 OS=Mus musculus OX=10090 GN=Krt87 PE=2 SV=2	Q6IMF0	0.0334772	1.63071	Keratin, type II cuticular 87 (Keratin-87, K87)	Krt87 Kb25 Krt2-25 Krt83
Q8K449	1	0.9	0.94	1.63	1.28	1.74	ATP-binding cassette sub-family A member 9 OS=Mus musculus OX=10090 GN=Abca9 PE=1 SV=2	Q8K449	0.0438789	1.63732	ATP-binding cassette sub-family A member 9, EC 7.6.2.-	Abca9
L7N221	1	0.54	0.66	1.09	1.33	1.28	Vomeronasal 2 receptor 112 OS=Mus musculus OX=10090 GN=Vmn2r112 PE=4 SV=1	L7N221	0.0481224	1.68182	Vomeronasal 2, receptor 112	Vmn2r112
Q80Y20	1	1.18	1.72	2.16	2.07	2.35	Alkylated DNA repair protein alkB homolog 8 OS=Mus musculus OX=10090 GN=Alkbh8 PE=1 SV=1	Q80Y20	0.0403257	1.68718	Alkylated DNA repair protein alkB homolog 8 (Probable alpha-ketoglutarate-dependent dioxygenase ABH8) (S-adenosyl-L-methionine-dependent tRNA methyltransferase ABH8) (tRNA (carboxymethyluridine(34)-5-O)-methyltransferase ABH8, EC 2.1.1.229)	Alkbh8
Q5I1X5	1	0.72	0.97	1.47	1.68	1.61	RelA-associated inhibitor OS=Mus musculus OX=10090 GN=Ppp1r13l PE=1 SV=1	Q5I1X5	0.00452436	1.76952	RelA-associated inhibitor (Inhibitor of ASPP protein, Protein iASPP) (NFkB-interacting protein 1) (PPP1R13B-like protein)	Ppp1r13l Nkip1
Q9D162	1	1.13	1.14	1.79	1.79	2.25	Coiled-coil domain-containing protein 167 OS=Mus musculus OX=10090 GN=Ccdc167 PE=1 SV=2	Q9D162	0.0234127	1.78287	Coiled-coil domain-containing protein 167	Ccdc167
Q9CQL0	1	0.74	1.06	1.72	1.93	1.53	Protein N-lysine methyltransferase METTL21A OS=Mus musculus OX=10090 GN=Mettl21A PE=2 SV=1	Q9CQL0	0.00683721	1.85	Protein N-lysine methyltransferase METTL21A, EC 2.1.1.- (Methyltransferase-like protein 21A)	Mettl21A Fam119a
Q68G58	1	0.47	0.76	1.63	1.43	1.08	DNA-(apurinic or apyrimidinic site) endonuclease 2 OS=Mus musculus OX=10090 GN=Apex2 PE=1 SV=1	Q68G58	0.0457259	1.8565	DNA-(apurinic or apyrimidinic site) endonuclease 2, EC 3.1.11.2 (APEX nuclease 2) (Apurinic-apyrimidinic endonuclease 2, AP endonuclease 2)	Apex2 Ape2
Q8BPI1	1	0.89	0.43	1.78	1.89	1.71	Protein kintoun OS=Mus musculus OX=10090 GN=Dnaaf2 PE=1 SV=2	Q8BPI1	0.0208021	2.31897	Protein kintoun (Dynein assembly factor 2, axonemal)	Dnaaf2 Ktu
Q9CZI9	1	0.95	1.03	2.4	2.72	1.91	Apoptosis-enhancing nuclease OS=Mus musculus OX=10090 GN=Aen PE=2 SV=1	Q9CZI9	0.0281158	2.35906	Apoptosis-enhancing nuclease, EC 3.1.-.- (Interferon-stimulated 20 kDa exonuclease-like 1)	Aen Isg20l1
Q921G6	1	0.24	0.62	1.91	1.44	1.17	Leucine-rich repeat and calponin homology domain-containing protein 4 OS=Mus musculus OX=10090 GN=Lrch4 PE=1 SV=1	Q921G6	0.045089	2.43011	Leucine-rich repeat and calponin homology domain-containing protein 4	Lrch4

## Sheet: Top_nodes
Accession	Gene Name	Label	FoldChange	Degree	degree
Q8R317	Ubqln1	Q8R317:Ubqln1	1.48846	18	14
Q9JKK8	Atr	Q9JKK8:Atr	1.43197	20	13
P70698	Ctps1	P70698:Ctps1	1.21713	18	11
Q80Y20	Alkbh8	Q80Y20:Alkbh8	1.68718	12	11
Q80X85	Mrps7	Q80X85:Mrps7	1.30503	16	10
P07607	Tyms	P07607:Tyms	1.24224	14	10
Q9D8P4	Mrpl17	Q9D8P4:Mrpl17	1.25234	13	10
Q9QZ05	Eif2ak4	Q9QZ05:Eif2ak4	1.40066	11	10
Q3TYA6	Mphosph8	Q3TYA6:Mphosph8	1.23311	16	9
Q8R3B7	Brd8	Q8R3B7:Brd8	1.23692	15	9
Q60680	Chuk	Q60680:Chuk	1.25418	14	9
Q8BGZ4	Cdc23	Q8BGZ4:Cdc23	1.22476	12	9
Q9WV85	Nme3	Q9WV85:Nme3	1.39362	12	9
P61620	Sec61a1	P61620:Sec61a1	1.42958	12	8
Q14CH7	Aars2	Q14CH7:Aars2	1.22476	12	8
Q9CR88	Mrps14	Q9CR88:Mrps14	1.44118	12	8
Q9DBU6	Rsrc1	Q9DBU6:Rsrc1	1.22414	10	7
Q5SVQ0	Kat7	Q5SVQ0:Kat7	1.39665	9	7
Q6P1G2	Kdm2b	Q6P1G2:Kdm2b	1.34843	11	6
Q68G58	Apex2	Q68G58:Apex2	1.8565	10	6
O55187	Cbx4	O55187:Cbx4	1.54313	9	6
Q9D4V0	Etnk1	Q9D4V0:Etnk1	1.31833	11	5
Q9JM05	Pias4	Q9JM05:Pias4	1.2451	10	5
Q9QYY8	Spast	Q9QYY8:Spast	1.25733	9	2
Q9QUG9	Rasgrp2	Q9QUG9:Rasgrp2	1.23247	9	2
